1  
2  
3  
4  
5  
6  
7  
8  
9  
10  
11  
12  
13  
14  
15  
16  
17  
18  
19  
20  
21  
22  
23

## The Antibiotic Neomycin Enhances Coxsackievirus Plaque Formation

Mikal A. Woods Acevedo, Julie K. Pfeiffer\*

<sup>1</sup>Department of Microbiology, University of Texas Southwestern Medical Center, Dallas, Texas, USA

Short Title: Neomycin enhances CVB3 plaque formation

Keywords: coxsackievirus, antibiotics, plaque assay, neomycin

Abstract word count:

Text word count:

\*Corresponding Author: Julie K. Pfeiffer

[Julie.Pfeiffer@UTSouthwestern.edu](mailto:Julie.Pfeiffer@UTSouthwestern.edu)

Phone: (214) 648-8775

## 24 **Abstract**

25           Coxsackievirus typically infects humans via the gastrointestinal tract, which has a  
26 large number of microorganisms collectively referred to as the microbiota. To study how  
27 the intestinal microbiota influence enteric virus infection, several groups have used an  
28 antibiotic regimen in mice to deplete bacteria. These studies have shown that bacteria  
29 promote infection with several enteric viruses. However, very little is known about  
30 whether antibiotics influence viruses in a microbiota-independent manner. Here, we  
31 sought to determine the effects of antibiotics on coxsackievirus B3 (CVB3) using an *in*  
32 *vitro* cell culture model in the absence of bacteria. We determined that an  
33 aminoglycoside antibiotic, neomycin, enhanced plaque size of CVB3-Nancy strain.  
34 Neomycin treatment did not alter viral attachment, translation, or replication. However,  
35 we found that the positive charge of neomycin and other positively charged compounds  
36 enhanced viral diffusion by overcoming the negative inhibitory effect of sulfated  
37 polysaccharides present in agar overlays. Overall, these data lend further evidence that  
38 antibiotics can play non-canonical roles in viral infections and that this should be  
39 considered when studying enteric virus-microbiota interactions.

40

## 41 **Importance**

42           Coxsackieviruses primarily infect the gastrointestinal tract of humans, but they  
43 can disseminate systemically and cause severe disease. Using antibiotic treatment  
44 regimens to deplete intestinal microbes in mice, several groups have shown the  
45 bacteria promote infection with a variety of enteric viruses. However, it is possible that  
46 antibiotics have microbiota-independent effects on viruses. Here, we show that

47 an aminoglycoside antibiotic, neomycin, can influence quantification of coxsackievirus  
48 in cultured cells in absence of bacteria.

49

## 50 **Introduction**

51 Coxsackievirus B3 (CVB3) is a cardiotropic nonenveloped RNA virus belonging  
52 to the *Enterovirus* genus of the *Picornaviridae* family. CVB3 is an important human  
53 pathogen, which can cause a wide range of diseases, including myocarditis, cardiac  
54 arrhythmias, aseptic meningitis, type 1 diabetes, gastrointestinal distress, and death (1-  
55 5). CVB3 has been implicated in over 40,000 infections a year in the United States  
56 alone and there are no current treatments or vaccines for CVB3 infections (6).

57 Within the gastrointestinal tract resides a microbial ecosystem of approximately  
58  $10^{14}$  organisms, which play a crucial role in host homeostasis (7). The intestinal  
59 microbiota can also influence infection with orally acquired enteric viruses (8-10).  
60 Alterations in microbiota, for example through antibiotic treatment, can influence enteric  
61 pathogen susceptibility (8-10). However, not much is known about direct effects of  
62 antibiotics on enteric viruses.

63 Antibiotics can have a variety of microbiota-independent effects on mammalian  
64 cells. Antibiotics can illicit profound changes in host gene expression in both  
65 conventional and germ-free mice (11), alter mammalian metabolic pathways and impair  
66 the phagocytic activity of immune cells (12), induce mitochondrial dysfunction (13, 14),  
67 and inhibit histone demethylases (15). Additionally, Gopinath et al. recently  
68 demonstrated that aminoglycoside antibiotics can confer microbiota-independent

69 antiviral resistance against both DNA and RNA viruses by upregulating expression of  
70 interferon-stimulated genes (16).

71 Here, we examined the effect of antibiotic treatment on CVB3 infection of  
72 cultured cells in the absence of bacteria. From a group of antibiotics that is commonly  
73 given to mice in microbiota depletion studies, we found that neomycin increases plaque  
74 size of CVB3. Notably, treatment with neomycin did not have an apparent effect on viral  
75 replication in single cycle growth curves. We determined that plaque size enhancement  
76 by neomycin was most likely due its positive charge overcoming the inhibitory negative  
77 charge of agar overlays, thus aiding viral diffusion.

78

## 79 **Results**

80 **Neomycin increases plaque size of CVB3-Nancy, but not poliovirus.** To examine  
81 the effect of antibiotics on plaque formation of CVB3-Nancy, we infected a monolayer of  
82 HeLa cells that were pretreated with or without 1 mg/ml of an antibiotic cocktail  
83 consisting of vancomycin, ampicillin, neomycin, and streptomycin. Following adsorption  
84 for 30 min, inoculum was removed, and an agar overlay with or without antibiotics was  
85 added. To visualize plaques, plates were stained with crystal violet 3 days post  
86 infection. When cells were exposed to the antibiotic cocktail, we observed a significant  
87 increase in CVB3-Nancy plaque size (Fig. 1A). Treatment with vancomycin, ampicillin,  
88 or streptomycin alone did not confer the large plaque phenotype (Fig. 1A), but treatment  
89 with neomycin was sufficient for the large plaque phenotype (Fig. 1B). We quantified  
90 plaque size and found that when cells were exposed to neomycin, CVB3-Nancy plaques  
91 averaged 6.9 mm<sup>2</sup>, while CVB3-Nancy plaques in untreated cells averaged 0.11 mm<sup>2</sup>

92 (Fig. 1C). We next determined whether neomycin also affects the plaque size of a  
93 closely related enteric virus, poliovirus. When cells were pretreated with or without  
94 neomycin and infected with poliovirus, plaques were relatively large and no increase in  
95 plaque size was observed with neomycin treatment (Fig. 1D and 1E). Overall, these  
96 data indicate that treatment with neomycin is capable of increasing plaque size CVB3-  
97 Nancy, but not poliovirus.

98

99 **Effect of neomycin on plaque size of different CVB3 strains.** Since neomycin was  
100 capable of increasing plaque size of CVB3-Nancy, but not poliovirus, we hypothesized  
101 that neomycin may also increase plaque size of closely related CVB3 strains. To  
102 investigate this hypothesis, we first used CVB3-Nancy-N63Y, which is a CVB3-Nancy  
103 derivative that contains a single point mutation in the VP3 capsid protein, N63Y, which  
104 induces formation of large plaques in agar overlays due to reduced binding to sulfated  
105 glycans (17). We found that neomycin was also capable of increasing plaque size of  
106 CVB3-Nancy-N63Y in agar overlays (Fig. 2), although the effect was less pronounced  
107 when compared to CVB3-Nancy due to the larger plaques of CVB3-Nancy-N63Y in  
108 untreated cells. We next examined if neomycin treatment could increase the plaque size  
109 of CVB3-H3, a strain of CVB3 that is more virulent in mice (18). Neomycin treatment  
110 did not alter CVB3-H3 plaque size (Fig. 2). These data indicate that in agar overlays  
111 neomycin is capable of increasing the size of CVB3-Nancy and a closely related mutant  
112 CVB3-Nancy-N63Y, but not of CVB3-H3.

113 The small plaque size of CVB3-Nancy under agar overlays has been attributed to  
114 its binding to sulfated glycans present in agar, which limits viral diffusion (17). However,

115 in agarose overlays, which contain low levels of sulfated glycans, CVB3-Nancy plaque  
116 size is significantly larger. Therefore, we sought to examine whether neomycin  
117 treatment can increase the plaque size of CVB3-Nancy, CVB3-Nancy-N63Y, and CVB3-  
118 H3 in agarose overlays. We found that neomycin increased the plaque size of CVB3-  
119 Nancy in presence of an agarose overlay (Fig 2), although the effect was diminished  
120 due to larger CVB3-Nancy plaques in agarose overlays. Similarly, CVB3-Nancy-N63Y  
121 plaques were slightly larger in the presence of neomycin (Fig 2). However, in agarose  
122 overlays, plaque size CVB3-H3 was unaffected by neomycin treatment (Fig. 2). Overall,  
123 these data suggest that in both agar and agarose overlays, neomycin can increase the  
124 plaque size of CVB3-Nancy and CVB3-Nancy-N63Y, but not of CVB3-H3.

125

126 **Early stages of CVB3-Nancy infection are unaffected by neomycin.** Given that  
127 CVB3-Nancy generates large plaques in the presence of neomycin, we hypothesized  
128 that neomycin enhances viral replication. To test this hypothesis, we first determined  
129 whether early steps of the viral replication cycle are affected by neomycin. To examine  
130 viral attachment, we quantified binding of radiolabeled  $^{35}\text{S}$ -labeled CVB3-Nancy to HeLa  
131 cells in the presence or absence of neomycin pre-treatment. HeLa cells were pre-  
132 treated with or without neomycin overnight, followed by incubation with  $^{35}\text{S}$ -labeled virus  
133 at 4°C for 20 min. After washing, cell-associated  $^{35}\text{S}$  was quantified.  $^{35}\text{S}$  counts were the  
134 same for cells treated with or without neomycin, suggesting that neomycin does not  
135 affect viral attachment (Fig. 3A). We next sought to determine if viral translation is  
136 affected by neomycin treatment. Picornaviruses, including CVB3, initiate translation  
137 early in the viral life cycle, which results in shutoff of host protein synthesis (19, 20).

138 HeLa cells that were pretreated overnight with or without neomycin were infected with  
139 CVB3-Nancy and then at various timepoints cells were exposed to media containing  
140 <sup>35</sup>S-labeled cysteine and methionine to label nascent proteins. Cell lysates were run on  
141 an SDS-PAGE gel and <sup>35</sup>S labeled proteins were imaged via phosphorimager. We  
142 found that the amount of labeled viral and cellular proteins were the same for cells  
143 treated with or without neomycin (Fig. 3B). Overall, these data suggest that neomycin  
144 does not affect the early stages of the CVB3-Nancy life cycle.

145

146 **Replication kinetics of CVB3-Nancy are unaffected by neomycin treatment.** To  
147 examine whether neomycin affects the replication kinetics of CVB3-Nancy, we used  
148 single-cycle growth curve assays. HeLa cells that were pretreated with or without  
149 neomycin were infected with CVB3-Nancy at an MOI of 0.01, and cell-associated viral  
150 titers were determined over time. CVB3-Nancy titers were the same for cells treated  
151 with or without neomycin at each timepoint analyzed (Fig. 4A). We next determined  
152 whether the presence of an agar overlay could alter the replication kinetics of CVB3-  
153 Nancy, and whether the presence of neomycin in the agar overlay could alter CVB3-  
154 Nancy growth. For these experiments, HeLa cells were pretreated with or without  
155 neomycin, cells were infected for 30 min with CVB3-Nancy at an MOI of 0.01, followed  
156 by addition of an agar overlay with or without neomycin. At 0, 2, 4, 6, or 8 hours post-  
157 infection, agar overlays were removed, cells were harvested, and cell-associated virus  
158 titers were determined by plaque assay on naïve cells. We found no difference in CVB3-  
159 Nancy replication in the presence of an agar overlay, with or without neomycin (Fig. 4B).  
160 Given that neomycin did not affect single cycle replication kinetics of CVB3-Nancy in

161 either liquid media or agar overlay, we next determined whether neomycin could alter  
162 spread during multiple replication cycles. One million HeLa cells were inoculated with  
163 100 PFU of CVB3-Nancy, in the presence or absence of neomycin, and the cells were  
164 incubated for 24 h to allow multiple replication cycles to occur. Viral titers in the  
165 presence of liquid media showed no differences in viral yield with or without neomycin  
166 (Fig. 4C). However, when CVB3-Nancy was grown for 24 h in the presence of an agar  
167 overlay, a significant increase in viral yield was detected in the presence of neomycin  
168 (Fig. 4D). Overall these data indicate that a single cycle of replication of CVB3-Nancy  
169 was unaffected by neomycin treatment, but titers from multiple cycles were increased by  
170 neomycin treatment when agar overlays were present, suggesting neomycin may aid  
171 viral spread in the presence of agar.

172

173 **Positive charge of neomycin contributes to generation of large CVB3-Nancy**  
174 **plaques.** Because neomycin increased plaque size of CVB3-Nancy in agar overlays  
175 and neomycin increased 24 h titers of CVB3-Nancy when an agar overlay was present,  
176 we hypothesized that neomycin enhances viral diffusion by overcoming inhibition by  
177 negatively charged compounds in agar overlays. Additionally, we hypothesized that  
178 neomycin must be present in the agar overlay to enhance plaque formation and that  
179 pre-treatment of cells with neomycin would not be sufficient to increase plaque size  
180 when neomycin was not present in agar overlays. To test this, we pretreated cells with  
181 or without neomycin, infected with 100 PFU of CVB3-Nancy and added an agar overlay  
182 with or without neomycin. We found that large plaques formed in cells with neomycin in  
183 agar overlays regardless of whether cells were pretreated with neomycin before



184 infection. Conversely, small plaques formed in cells without neomycin in agar overlays  
185 regardless of whether they were pretreated with neomycin (Fig. 4E). Thus, the presence  
186 of neomycin in the overlay is sufficient to increase plaque size of CVB3-Nancy.

187 Agar is rich in anionic sulfated polysaccharides, which inhibits some viruses by  
188 binding and preventing cell adsorption or diffusion (21-23), and cationic compounds can  
189 overcome this negative charge inhibition of the agar overlay (22). Given that neomycin  
190 is also a positively charged compound (24), we hypothesized that neomycin increases  
191 CVB3-Nancy plaque size by overcoming the inhibitory negative charge of the agar  
192 overlay. To test this, we evaluated whether other positively charged compounds could  
193 also increase the plaque size of CVB3-Nancy. We found that two positively charged  
194 compounds, poly-L-lysine and protamine, increased plaque size of CVB3-Nancy (Fig.  
195 5A). We next determined whether neomycin was capable of overcoming the inhibitory  
196 effect of negatively-charged heparin (17). We found that CVB3-Nancy was able to  
197 generate large plaques in the presence of heparin when neomycin was present (Fig.  
198 5B). These data indicate that the positive charge of neomycin contributes to large  
199 plaque formation of CVB3-Nancy.

200 Because other positively charged compounds phenocopy neomycin's effects, we  
201 hypothesized that neomycin facilitates large plaque formation of CVB3-Nancy by  
202 neutralizing negatively charged inhibitory molecules in agar, allowing the virus to diffuse  
203 more efficiently. To test this, we used a diffusion assay previously described by Wallis  
204 and Melnick (22). Agar overlays with or without neomycin or protamine were added to  
205 untreated and uninfected HeLa cells and overlays were allowed to solidify. Then,  $5 \times$   
206  $10^4$  PFU of CVB3-Nancy was added dropwise on top of the agar overlay. Virus was

207 allowed to diffuse downward through the ~1 cm-thick agar overlay and infect cells and  
208 plates were stained with crystal violet at 1, 2, or 3 dpi to examine cell death. We found  
209 that CVB3-Nancy diffusion and subsequent cell death was greatly enhanced when  
210 either neomycin or protamine was added to the agar overlays, when compared to agar  
211 overlays with no treatment (Fig. 6). Overall these results suggest that the positive  
212 charge of neomycin enhances CVB3-Nancy diffusion by overcoming the negative  
213 charge of agar overlays.

214

## 215 **Discussion**

216 Although it is known that antibiotics deplete the gut microbiota of mice and  
217 microbiota depletion reduces infection of certain enteric viruses, it remains unclear if  
218 antibiotics can directly affect enteric viruses independently of effects on the microbiota.  
219 Here we shown that an aminoglycoside antibiotic, neomycin, increases plaque size of  
220 CVB3-Nancy. In this study, we found that neomycin enhances CVB3-Nancy plaque  
221 formation through increased viral diffusion due to its positive charge.

222 CVB3-Nancy is a cell culture adapted virus that has increased binding to heparan  
223 sulfate, a negatively charged sulfated polysaccharide that is present on the surface of  
224 cells and in agar overlays (17, 21). The presence of sulfated polysaccharides in agar  
225 overlays limits diffusion of certain heparan sulfate binding viruses, which results in  
226 formation of small plaques (21). Interestingly, CVB3-Nancy-N63Y, a derivative of CVB3-  
227 Nancy that contains a single mutation that decreases virion binding to sulfated  
228 polysaccharides, also had increased plaque size due to neomycin treatment. CVB3-  
229 Nancy-N63Y has larger plaques in agar overlays, suggesting its diffusion is less limited

230 by the negative charge of the sulfated polysaccharides (Fig. 2). CVB3-H3 is a less  
231 culture adapted and more pathogenic strain of CVB3, and CVB3-H3 formed large  
232 plaques either in presence or absence of neomycin (Fig. 2). Since neomycin only had  
233 an effect on plaque formation of CVB3-Nancy strains, but not CVB3-H3 or poliovirus,  
234 neomycin may only enhance diffusion of viruses that bind to negatively charged sulfated  
235 polysaccharides.

236 Anionic polymers, such as sulfated polysaccharides present in agar overlays,  
237 have inhibitory effects by limiting adsorption of newly formed virions to cells (22, 25, 26).  
238 Protamine, a positively charged compound, enhances plaque size of  
239 encephalomyocarditis virus and adenovirus (22, 25, 26), promotes diffusion of  
240 enterovirus (27), and enhances infectivity of rabies virus (28). In agreement with  
241 previous studies, we found that protamine significantly enhanced plaque size of CVB3-  
242 Nancy in the presence of an agar overlay (Fig 5A). We also found that poly-L-lysine, a  
243 compound with similar charge to neomycin (29), also increased CVB3-Nancy plaque  
244 size in the presence of an agar overlay. To confirm that the positive charge of neomycin  
245 enhances viral diffusion, we performed a diffusion assay and found that neomycin or  
246 protamine treated overlays enhanced CVB3-Nancy diffusion.

247 In conclusion, we found that positively charged compounds, such as neomycin,  
248 poly-L-lysine, and protamine, aid CVB3-Nancy and CVB3-N63Y diffusion in the  
249 presence of either an agar or agarose overlay. This work provides insight into methods  
250 to enhance plaque formation and reveals that a commonly used antibiotic can have  
251 microbiota-independent effects on a virus.

252

## 253 MATERIALS AND METHODS

254 **Cells and virus.** HeLa cells were grown in Dulbecco's modified Eagle's Medium  
255 (DMEM) supplemented with 10% calf serum (Sigma-Aldrich) and 1% penicillin-  
256 streptomycin (Sigma-Aldrich). The CVB3-Nancy and CVB3-H3 infectious clones were  
257 obtained from Marco Vignuzzi (Pasteur Institute, Paris, France) and the CVB3-Nancy-  
258 N63Y infectious clone was previously generated from CVB3-Nancy by site directed  
259 mutagenesis (17). The poliovirus infectious clone was serotype 1 Mahoney (30). Viral  
260 stocks were prepared as previously described (17) and viral titers were determined by  
261 plaque assay as previous described (17, 31). Briefly, monolayers of HeLa cells were  
262 infected for 30 min followed by addition of an overlay containing media and 1% agar  
263 (Becton Dickinson) or 1% SeaKem™ LE Agarose (Lonza). Following incubation,  
264 plaques were visualized by staining with an alcoholic solution of crystal violet. Neomycin-  
265 treated cells were pretreated overnight with 1 mg/ml of neomycin (Research Products  
266 International).

267  
268 **CVB3 cell attachment.** <sup>35</sup>S-labeled CVB3-Nancy was generated as previously  
269 described (8)(17). Briefly, cells were infected with CVB3-Nancy in the presence of <sup>35</sup>S-L-  
270 methionine and <sup>35</sup>S-L-cysteine Express Labeling Mix (PerkinElmer), and viruses in cell  
271 lysates were purified using CsCl gradient ultracentrifugation (8)(17). 6000 CPM (6 x 10<sup>6</sup>  
272 PFU) was incubated with 1 x 10<sup>6</sup> HeLa cells that were pretreated with or without 1  
273 mg/ml neomycin at 4°C for 20 min to promote viral binding. Cells were washed three  
274 times with ice cold phosphate-buffered saline (PBS) to remove unbound labeled virus,

275 trypsinized, and  $^{35}\text{S}$  was quantified in a scintillation counter (Beckman Coulter, LS6500  
276 Multi-Purpose Scintillation Counter).

277

278 **CVB3 translation assay.**  $2.5 \times 10^6$  HeLa cells were pretreated with or without 1  
279 mg/ml of neomycin for 16 h and were inoculated with CVB3-Nancy at an MOI of 20 for  
280 30 min at 37°C. Inoculum was aspirated, cells were washed with PBS, and complete  
281 DMEM was added. At 2, 4, and 5 hours post infection (hpi), cells were washed and  
282 incubated in 1 ml of DMEM lacking methionine and cysteine (Sigma-Aldrich) with 55  $\mu\text{Ci}$   
283 of  $^{35}\text{S}$  Express Labeling Mix (PerkinElmer) for 15 min at 37°. Cells were harvested and  
284 lysed in buffer containing 10 mM Tris pH 8, 10 mM NaCl, 1.5 mM  $\text{MgCl}_2$ , and 1% NP-  
285 40, and nuclei were removed by centrifugation. Supernatants from equal cell numbers  
286 were analyzed on 4–20% Mini-PROTEAN® TGX™ Precast Protein Gels (Bio-Rad).  
287 Gels were dried at 80°C for 1 hour and exposed to a phosphorimager screen overnight.  
288 Radiolabeled proteins were visualized using a PhosphorImager (Typhoon FLA 9500).

289

290 **Viral growth curves.**  $1 \times 10^6$  HeLa cells pretreated overnight with or without 1  
291 mg/ml neomycin were inoculated with CVB3-Nancy at an MOI of 0.01. Virus was  
292 incubated for 30 min at 37°C to promote viral binding, inoculum was aspirated, the cell  
293 monolayer was washed once in PBS, and 2 ml of either DMEM or 1% Agar/1% DMEM  
294 mixture with or without 1 mg/ml neomycin was added. At 0, 2, 4, 6, and 8 hours post  
295 infection, media was removed, the cell monolayer was washed once in PBS, and cells  
296 were trypsinized and pelleted. Intracellular virus was harvested by freeze-thawing three  
297 times. For 24 hpi assays, cells were infected with 100 PFU of CVB3-Nancy and 2 ml of

298 either DMEM or 1% Agar/1% DMEM mixture with or without 1 mg/ml neomycin was  
299 added. Plaque assay, as described above, was used to quantify amount of intracellular  
300 PFU.

301

302 **Viral diffusion assay.**  $1 \times 10^6$  uninoculated HeLa cells in 60 mm tissue culture  
303 plates were overlaid with 4 ml of 1% Agar/1% DMEM mixture with or without 1 mg/ml  
304 neomycin or 0.8 mg/ml protamine. Once the overlay had solidified,  $5 \times 10^4$  PFU of  
305 CVB3-Nancy in 200  $\mu$ L was added dropwise to the overlay. Cells were placed at 37°C  
306 to allow diffusion of the virus through the overlay to the cell monolayer. Plates were  
307 stained with crystal violet at 1, 2, or 3 days post-infection.

308

309 **Statistical analysis.** The difference between groups were examined by unpaired  
310 two-tailed Students t-test. Error bars represent the mean  $\pm$  the standard error of the  
311 mean.  $P < 0.05$  was considered significant. All analysis of data were performed using  
312 Graph Pad Prism version 7.00 for Windows, GraphPad Software, La Jolla California  
313 USA.

314

### 315 **Acknowledgements**

316 We thank Andrea Erickson and Broc McCune for helpful comments on the manuscript.

317

### 318 **Funding Information**

319 Work in J.K.P.'s lab is funded through NIH NIAID grant R01 AI74668, a Burroughs

320 Wellcome Fund Investigators in the Pathogenesis of Infectious Diseases Award, and a

321 Faculty Scholar grant from the Howard Hughes Medical Institute. MWA was supported  
322 in part by NIH NIAID grant T32 AI007520.

323

## 324 **FIGURE LEGENDS**

### 325 **Figure 1. Effect of neomycin on plaque formation of CVB3-Nancy and poliovirus.**

326 A) Effects of antibiotics on CVB3-Nancy plaque formation. HeLa cells were pretreated  
327 with or without 1 mg/ml of the indicated antibiotics prior to plating 100 PFU of CVB3-  
328 Nancy on cells with agar overlays with or without 1 mg/ml of each antibiotic. Plates were  
329 stained with crystal violet 48 hpi. Abx= ampicillin, neomycin, streptomycin, and  
330 vancomycin mixture. Effects of neomycin on CVB3-Nancy (B) or poliovirus (D). C)  
331 Plaque size quantification of B. E) Plaque size quantification of D. Each symbol  
332 represents a plaque. \*\*\*\*,  $P < 0.0001$  (unpaired two-tailed Student *t* tests). ns= not  
333 significant.

334

### 335 **Figure 2. Effect of neomycin on plaque formation of different CVB3 strains.**

336 HeLa cells were pretreated with or without neomycin and were infected with  
337 approximately 100 PFU of CVB3-Nancy, CVB3-Nancy-N63Y, or CVB3-H3, and then  
338 agar or agarose overlays, containing or lacking 1 mg/ml neomycin, were added.

339

### 340 **Figure 3. Effects of neomycin on early stages of the CVB3-Nancy replication** 341 **cycle.**

342 A) Cell attachment assay.  $1 \times 10^6$  HeLa cells were pretreated with or without neomycin  
343 prior to incubation with 6000 CPM ( $6 \times 10^6$  PFU) of  $^{35}\text{S}$ -labeled CVB3-Nancy or no virus  
344 (Mock) at  $4^\circ\text{C}$  for 20 min to promote viral binding. Cells were washed and  $^{35}\text{S}$  was  
345 quantified in a scintillation counter. Data are means  $\pm$  standard errors of the means, ns=  
346 not significant (unpaired two-tailed Student *t* tests). B) Viral protein synthesis assay.  $2.5$   
347  $\times 10^6$  HeLa cells that were pretreated with or without neomycin were inoculated with  
348 CVB3-Nancy at an MOI of 20 for 30 min at  $37^\circ\text{C}$ . At indicated time points, cells were  
349 washed and incubated in 1ml of DMEM lacking methionine and cysteine supplemented  
350 with  $^{35}\text{S}$ -L-methionine and  $^{35}\text{S}$ -L-cysteine for 15 min at  $37^\circ$ . Cell lysates from equal cell  
351 numbers were analyzed on SDS-PAGE gel. Radiolabeled proteins were visualized  
352 using a PhosphorImager.

353

354 **Figure 4. Effects of neomycin on CVB3-Nancy replication kinetics.**

355 Growth curve in presence of liquid media (A) or agar overlay (B). Briefly,  $1 \times 10^6$  HeLa  
356 cells that were pretreated with or without neomycin were inoculated with CVB3-Nancy at  
357 an MOI of 0.01. Virus was incubated for 30 min at  $37^\circ\text{C}$  and either DMEM liquid (A) or  
358 1% Agar/1% DMEM mixture (B) with or without neomycin was added. At indicated  
359 timepoints, intracellular virus was harvested and quantified by plaque assay. To  
360 examine multi-cycle replication and spread, cells were infected with 100 PFU of CVB3-  
361 Nancy and either DMEM (C) or 1% Agar/1% DMEM mixture (D) with or without  
362 neomycin followed by plaque assay of cell-associated virus. E) HeLa cells were  
363 pretreated with or without 1 mg/ml of neomycin prior to plating 100 PFU of CVB3-Nancy  
364 on cells with agar overlays with or without 1 mg/ml of neomycin. Plates were stained



365 with crystal violet 48 hpi. \*,  $P < 0.05$  (unpaired two-tailed Student *t* tests), ns= not  
366 significant.

367

368 **Figure 5. Effect of positively or negatively charged compounds on CVB3-Nancy**  
369 **plaque formation.**

370 A)  $8.8 \times 10^6$  HeLa cells were infected with 100 PFU of CVB3-Nancy and agar overlays  
371 were added with or without  $0.1 \mu\text{M}$  poly-L-lysine or 0.8 mg/ml protamine (positively  
372 charged compounds). B)  $8.8 \times 10^6$  HeLa cells were infected with 100 PFU of CVB3-  
373 Nancy and neomycin-containing agar or agarose overlays were added with or without 1  
374 mg/ml of heparin (negatively charged compound).

375

376 **Figure 6. Effects of positively charged compounds on CVB3-Nancy diffusion.**

377  $1 \times 10^6$  HeLa cells in 60 mm tissue culture plates were overlaid with 4 ml of 1% Agar/1%  
378 DMEM mixture that contained or lacked 1 mg/ml neomycin or 0.8 mg/ml protamine.  
379 Once the overlay had solidified,  $5 \times 10^4$  PFU of CVB3-Nancy in 200  $\mu\text{L}$  was added  
380 dropwise to the top of the overlay. Cells were placed at  $37^\circ\text{C}$  to allow diffusion of the  
381 virus through the overlay to the cell monolayer and plates were stained with crystal  
382 violet at 1, 2, or 3 days post infection (dpi) to reveal the extent of cell death from viral  
383 replication.

384

385 **References**

- 386 1. Tam PE. 2006. Coxsackievirus myocarditis: interplay between virus and host in  
387 the pathogenesis of heart disease. *Viral Immunol* 19:133-46.
- 388 2. Tracy S, Hofling K, Pirruccello S, Lane PH, Reyna SM, Gauntt CJ. 2000. Group  
389 B coxsackievirus myocarditis and pancreatitis: connection between viral virulence  
390 phenotypes in mice. *J Med Virol* 62:70-81.
- 391 3. Tracy S, Drescher KM. 2007. Coxsackievirus infections and NOD mice: relevant  
392 models of protection from, and induction of, type 1 diabetes. *Ann N Y Acad Sci*  
393 1103:143-51.
- 394 4. Tracy S, Drescher KM, Chapman NM, Kim KS, Carson SD, Pirruccello S, Lane  
395 PH, Romero JR, Leser JS. 2002. Toward testing the hypothesis that group B  
396 coxsackieviruses (CVB) trigger insulin-dependent diabetes: inoculating nonobese  
397 diabetic mice with CVB markedly lowers diabetes incidence. *J Virol* 76:12097-  
398 111.
- 399 5. Chen P, Tao Z, Song Y, Liu G, Wang H, Liu Y, Song L, Li Y, Lin X, Cui N, Xu A.  
400 2013. A coxsackievirus B5-associated aseptic meningitis outbreak in Shandong  
401 Province, China in 2009. *J Med Virol* 85:483-9.
- 402 6. Khetsuriani N, Lamonte-Fowlkes A, Oberst S, Pallansch MA, Centers for Disease  
403 C, Prevention. 2006. Enterovirus surveillance--United States, 1970-2005. *MMWR*  
404 *Surveill Summ* 55:1-20.
- 405 7. Lynch SV, Pedersen O. 2016. The Human Intestinal Microbiome in Health and  
406 Disease. *N Engl J Med* 375:2369-2379.

- 407 8. Kuss SK, Best GT, Etheredge CA, Pruijssers AJ, Frierson JM, Hooper LV,  
408 Dermody TS, Pfeiffer JK. 2011. Intestinal microbiota promote enteric virus  
409 replication and systemic pathogenesis. *Science* 334:249-52.
- 410 9. Kane M, Case LK, Kopaskie K, Kozlova A, MacDearmid C, Chervonsky AV,  
411 Golovkina TV. 2011. Successful transmission of a retrovirus depends on the  
412 commensal microbiota. *Science* 334:245-9.
- 413 10. Baldrige MT, Nice TJ, McCune BT, Yokoyama CC, Kambal A, Wheadon M,  
414 Diamond MS, Ivanova Y, Artyomov M, Virgin HW. 2015. Commensal microbes  
415 and interferon-lambda determine persistence of enteric murine norovirus  
416 infection. *Science* 347:266-9.
- 417 11. Morgun A, Dzutsev A, Dong X, Greer RL, Sexton DJ, Ravel J, Schuster M, Hsiao  
418 W, Matzinger P, Shulzhenko N. 2015. Uncovering effects of antibiotics on the  
419 host and microbiota using transkingdom gene networks. *Gut* 64:1732-43.
- 420 12. Yang JH, Bhargava P, McCloskey D, Mao N, Palsson BO, Collins JJ. 2017.  
421 Antibiotic-Induced Changes to the Host Metabolic Environment Inhibit Drug  
422 Efficacy and Alter Immune Function. *Cell Host Microbe* 22:757-765 e3.
- 423 13. Moullan N, Mouchiroud L, Wang X, Ryu D, Williams EG, Mottis A, Jovaisaite V,  
424 Frochoux MV, Quiros PM, Deplancke B, Houtkooper RH, Auwerx J. 2015.  
425 Tetracyclines Disturb Mitochondrial Function across Eukaryotic Models: A Call  
426 for Caution in Biomedical Research. *Cell Rep* doi:10.1016/j.celrep.2015.02.034.
- 427 14. Kalghatgi S, Spina CS, Costello JC, Liesa M, Morones-Ramirez JR, Slomovic S,  
428 Molina A, Shirihai OS, Collins JJ. 2013. Bactericidal antibiotics induce

- 429 mitochondrial dysfunction and oxidative damage in Mammalian cells. *Sci Transl*  
430 *Med* 5:192ra85.
- 431 15. Badal S, Her YF, Maher LJ, 3rd. 2015. Nonantibiotic Effects of Fluoroquinolones  
432 in Mammalian Cells. *J Biol Chem* 290:22287-97.
- 433 16. Gopinath S, Kim MV, Rakib T, Wong PW, van Zandt M, Barry NA, Kaisho T,  
434 Goodman AL, Iwasaki A. 2018. Topical application of aminoglycoside antibiotics  
435 enhances host resistance to viral infections in a microbiota-independent manner.  
436 *Nat Microbiol* 3:611-621.
- 437 17. Wang Y, Pfeiffer JK. 2016. Emergence of a Large-Plaque Variant in Mice  
438 Infected with Coxsackievirus B3. *MBio* 7:e00119.
- 439 18. Robinson CM, Wang Y, Pfeiffer JK. 2017. Sex-Dependent Intestinal Replication  
440 of an Enteric Virus. *J Virol* 91.
- 441 19. Gradi A, Svitkin YV, Imataka H, Sonenberg N. 1998. Proteolysis of human  
442 eukaryotic translation initiation factor eIF4GII, but not eIF4GI, coincides with the  
443 shutoff of host protein synthesis after poliovirus infection. *Proc Natl Acad Sci U S*  
444 *A* 95:11089-94.
- 445 20. Chase AJ, Semler BL. 2012. Viral subversion of host functions for picornavirus  
446 translation and RNA replication. *Future Virol* 7:179-191.
- 447 21. Takemoto KK, Lieber H. 1961. Virus-polysaccharide interactions. I. An agar  
448 polysaccharide determining plaque morphology of EMC virus. *Virology* 14:456-  
449 62.
- 450 22. Wallis C, Melnick JL. 1968. Mechanism of enhancement of virus plaques by  
451 cationic polymers. *J Virol* 2:267-74.

- 452 23. Young BG, Mora PT. 1960. Viability of T2 bacteriophage after interaction with  
453 negatively charged macromolecules. *Virology* 12:493-5.
- 454 24. Mead FC, Williams AJ. 2004. Electrostatic mechanisms underlie neomycin block  
455 of the cardiac ryanodine receptor channel (RyR2). *Biophys J* 87:3814-25.
- 456 25. Colter JS, Campbell JB. 1965. The effect of polyanions and polycations on  
457 Mengo virus--I cell interaction. *Ann N Y Acad Sci* 130:383-9.
- 458 26. Liebhaber H, Takemoto KK. 1961. Alteration plaque morphology of EMC virus  
459 with polycations. *Virology* 14:502-4.
- 460 27. Conant RM, Barron AL. 1967. Enhanced diffusion of enterovirus antigens in agar  
461 gel in the presence of protamine. *Virology* 33:547-9.
- 462 28. Kaplan MM, Wiktor TJ, Maes RF, Campbell JB, Koprowski H. 1967. Effect of  
463 polyions on the infectivity of rabies virus in tissue culture: construction of a single-  
464 cycle growth curve. *J Virol* 1:145-51.
- 465 29. Langeland N, Moore LJ, Holmsen H, Haarr L. 1988. Interaction of polylysine with  
466 the cellular receptor for herpes simplex virus type 1. *J Gen Virol* 69 ( Pt 6):1137-  
467 45.
- 468 30. Racaniello VR, Baltimore D. 1981. Molecular cloning of poliovirus cDNA and  
469 determination of the complete nucleotide sequence of the viral genome. *Proc*  
470 *Natl Acad Sci U S A* 78:4887-91.
- 471 31. Pfeiffer JK, Kirkegaard K. 2003. A single mutation in poliovirus RNA-dependent  
472 RNA polymerase confers resistance to mutagenic nucleotide analogs via  
473 increased fidelity. *Proc Natl Acad Sci U S A* 100:7289-94.

## Figure 1

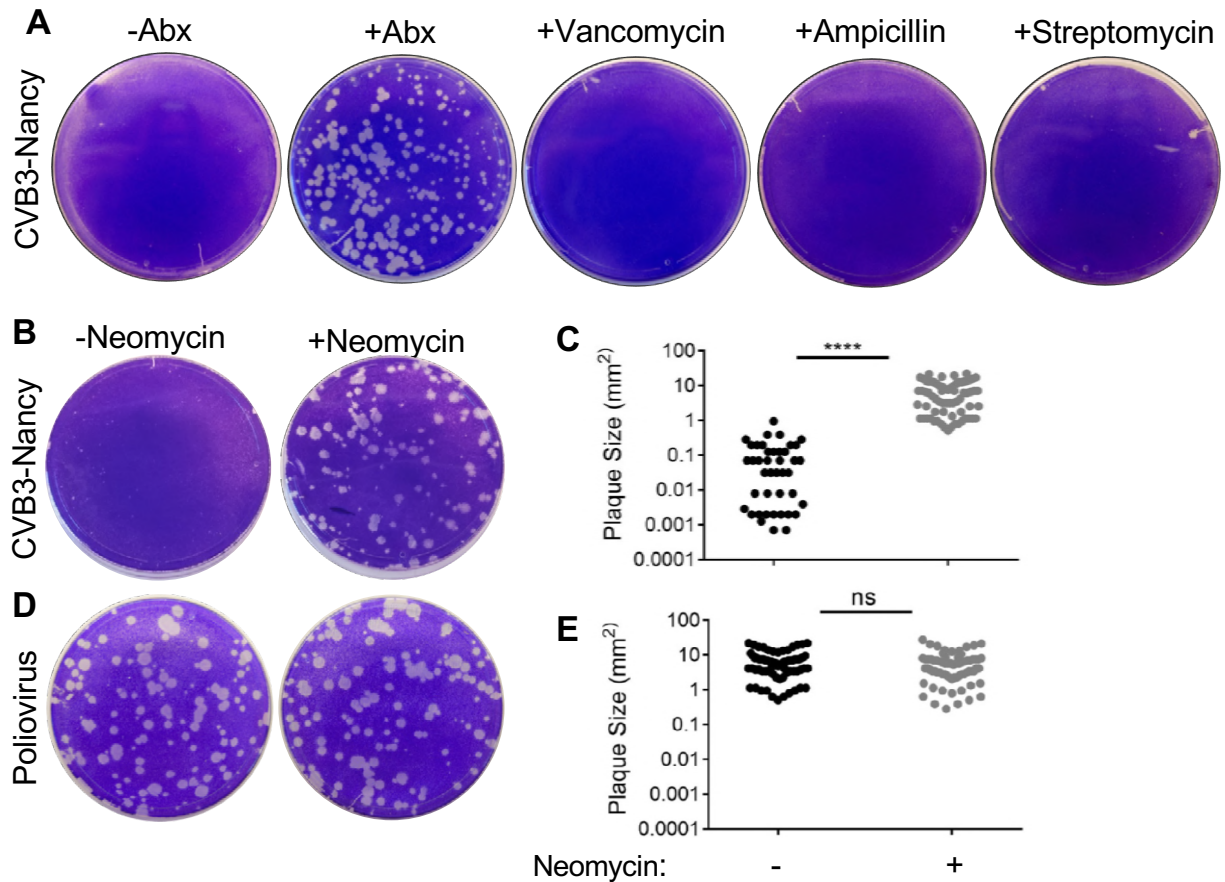

### Figure 1. Effect of neomycin on plaque formation of CVB3-Nancy and poliovirus.

A) Effects of antibiotics on CVB3-Nancy plaque formation. HeLa cells were pretreated with or without 1 mg/ml of the indicated antibiotics prior to plating 100 PFU of CVB3-Nancy on cells with agar overlays with or without 1 mg/ml of each antibiotic. Plates were stained with crystal violet 48 hpi. Abx= ampicillin, neomycin, streptomycin, and vancomycin mixture. Effects of neomycin on CVB3-Nancy (B) or poliovirus (D). C) Plaque size quantification of B. E) Plaque size quantification of D. Each symbol represents a plaque. \*\*\*\*,  $P < 0.0001$  (unpaired two-tailed Student *t* tests). ns= not significant.

## Figure 2

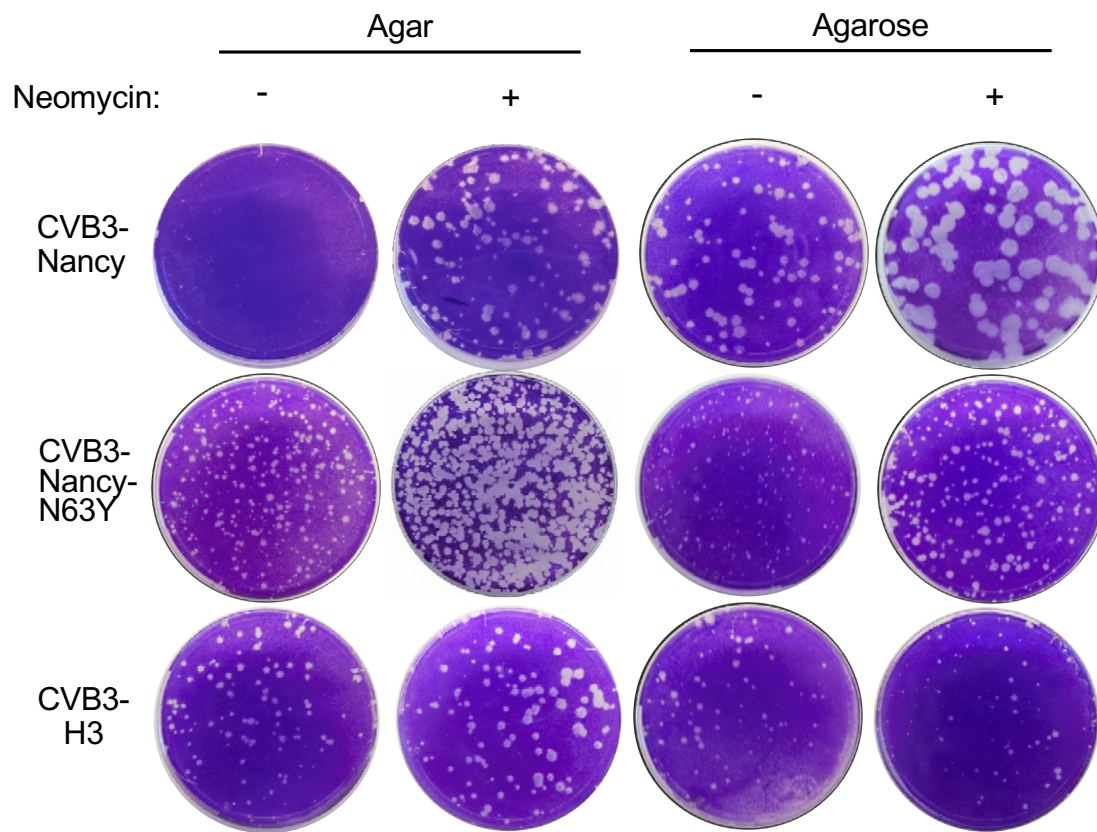

**Figure 2. Effect of neomycin on plaque formation of different CVB3 strains.**

HeLa cells were pretreated with or without neomycin and were infected with approximately 100 PFU of CVB3-Nancy, CVB3-Nancy-N63Y, or CVB3-H3, and then agar or agarose overlays, containing or lacking 1 mg/ml neomycin, were added.

## Figure 3

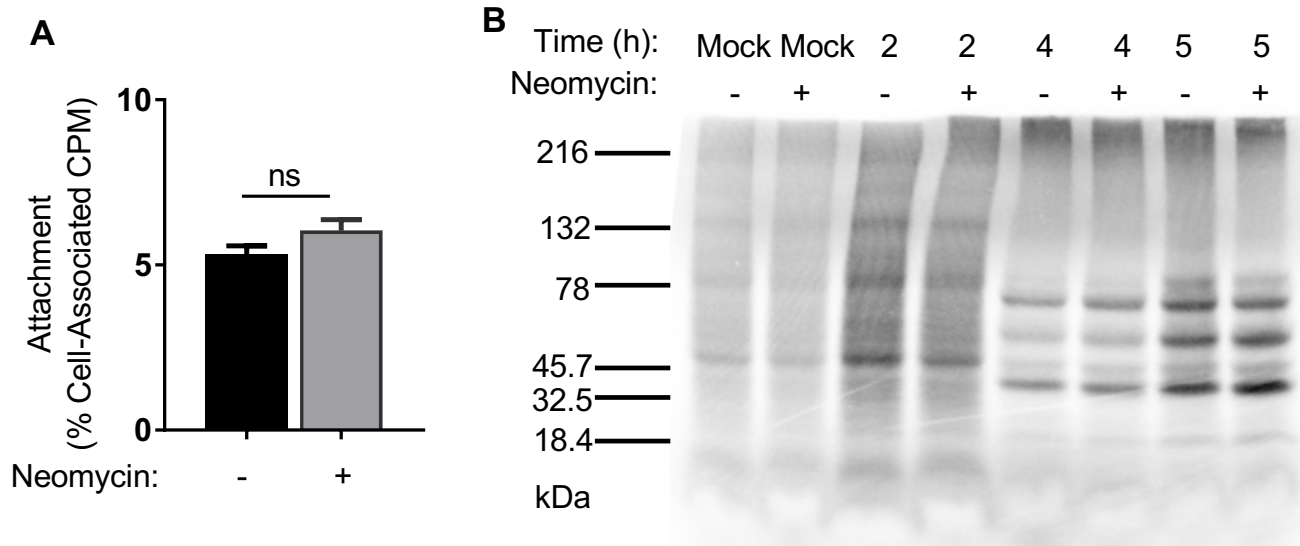

### Figure 3. Effects of neomycin on early stages of the CVB3-Nancy replication cycle.

A) Cell attachment assay.  $1 \times 10^6$  HeLa cells were pretreated with or without neomycin prior to incubation with 6000 CPM ( $6 \times 10^6$  PFU) of  $^{35}\text{S}$ -labeled CVB3-Nancy or no virus (Mock) at  $4^\circ\text{C}$  for 20 min to promote viral binding. Cells were washed and  $^{35}\text{S}$  was quantified in a scintillation counter. Data are means  $\pm$  standard errors of the means, ns= not significant (unpaired two-tailed Student *t* tests). B) Viral protein synthesis assay.  $2.5 \times 10^6$  HeLa cells that were pretreated with or without neomycin were inoculated with CVB3-Nancy at an MOI of 20 for 30 min at  $37^\circ\text{C}$ . At indicated time points, cells were washed and incubated in 1ml of DMEM lacking methionine and cysteine supplemented with  $^{35}\text{S}$ -L-methionine and  $^{35}\text{S}$ -L-cysteine for 15 min at  $37^\circ$ . Cell lysates from equal cell numbers were analyzed on SDS-PAGE gel. Radiolabeled proteins were visualized using a PhosphorImager.



## Figure 4

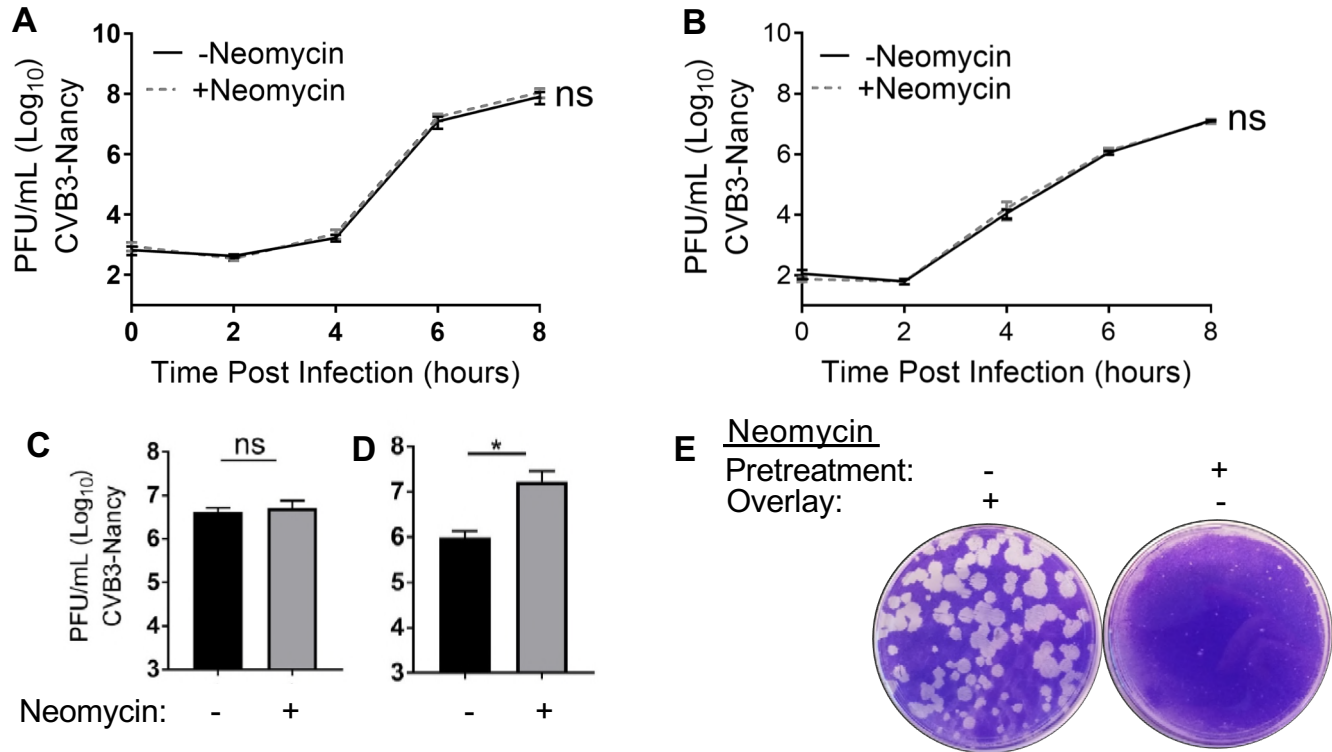

### Figure 4. Effects of neomycin on CVB3-Nancy replication kinetics.

Growth curve in presence of liquid media (A) or agar overlay (B). Briefly,  $1 \times 10^6$  HeLa cells that were pretreated with or without neomycin were inoculated with CVB3-Nancy at an MOI of 0.01. Virus was incubated for 30 min at 37°C and either DMEM liquid (A) or 1% Agar/1% DMEM mixture (B) with or without neomycin was added. At indicated timepoints, intracellular virus was harvested and quantified by plaque assay. To examine multi-cycle replication and spread, cells were infected with 100 PFU of CVB3-Nancy and either DMEM (C) or 1% Agar/1% DMEM mixture (D) with or without neomycin followed by plaque assay of cell-associated virus. E) HeLa cells were pretreated with or without 1 mg/ml of neomycin prior to plating 100 PFU of CVB3-Nancy on cells with agar overlays with or without 1 mg/ml of neomycin. Plates were stained with crystal violet 48 hpi. \*,  $P < 0.05$  (unpaired two-tailed Student *t* tests), ns= not significant.

## Figure 5

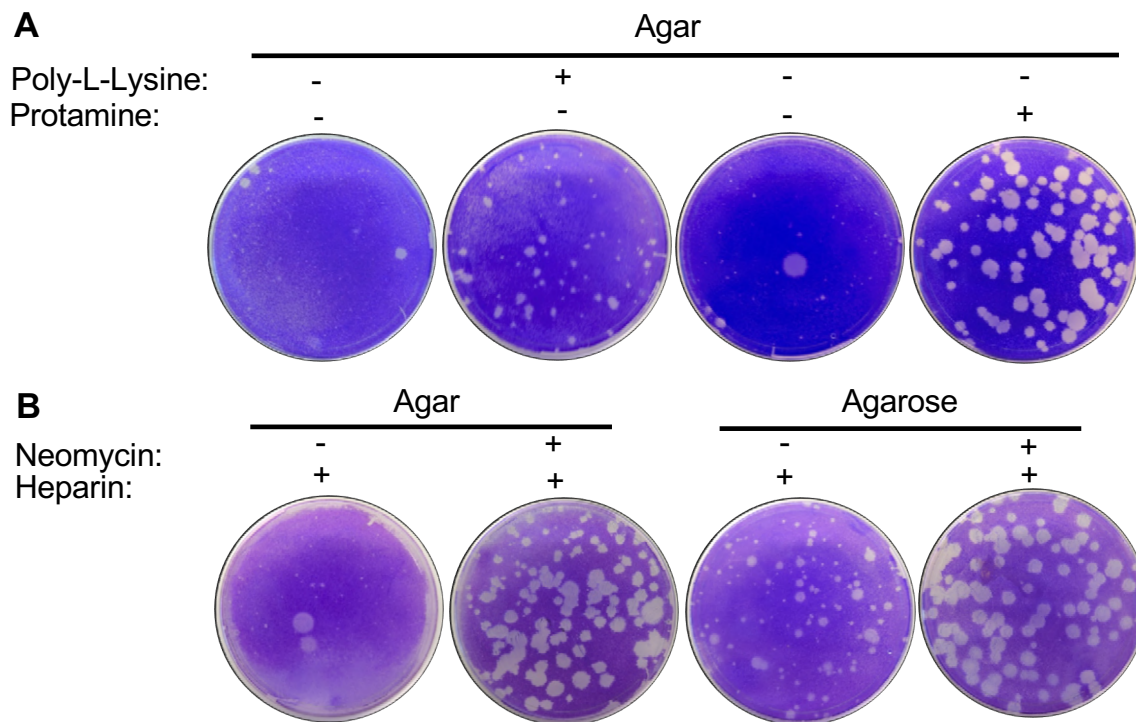

### Figure 5. Effect of positively or negatively charged compounds on CVB3-Nancy plaque formation.

A)  $8.8 \times 10^6$  HeLa cells were infected with 100 PFU of CVB3-Nancy and agar overlays were added with or without  $0.1 \mu\text{M}$  poly-L-lysine or  $0.8 \text{ mg/ml}$  protamine (positively charged compounds). B)  $8.8 \times 10^6$  HeLa cells were infected with 100 PFU of CVB3-Nancy and neomycin-containing agar or agarose overlays were added with or without  $1 \text{ mg/ml}$  of heparin (negatively charged compound).

## Figure 6

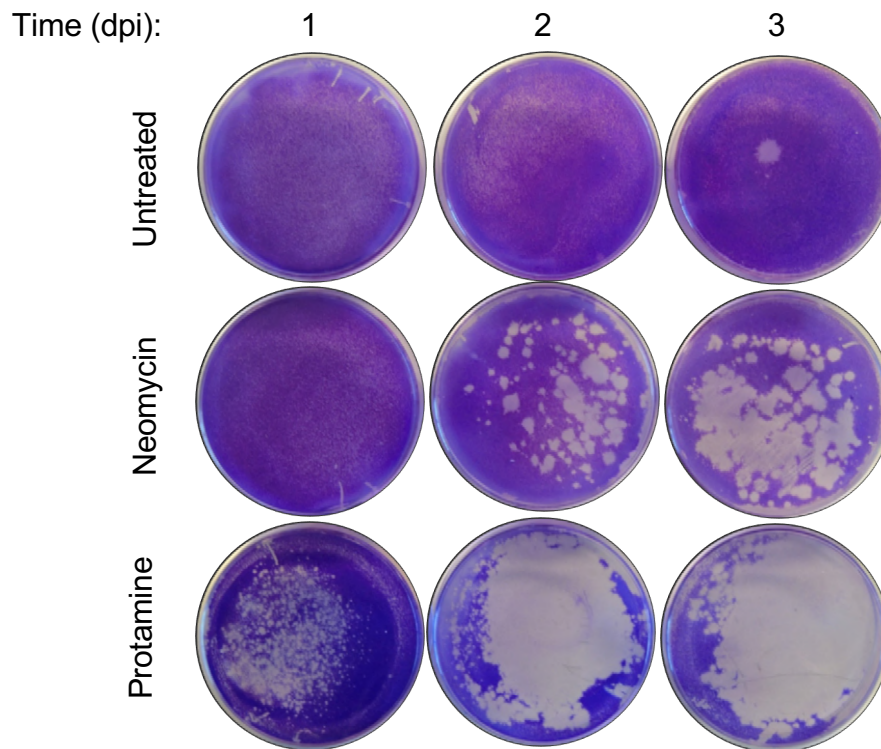

**Figure 6. Effects of positively charged compounds on CVB3-Nancy diffusion.**

$1 \times 10^6$  HeLa cells in 60 mm tissue culture plates were overlaid with 4 ml of 1% Agar/1% DMEM mixture that contained or lacked 1 mg/ml neomycin or 0.8 mg/ml protamine. Once the overlay had solidified,  $5 \times 10^4$  PFU of CVB3-Nancy in 200  $\mu$ L was added dropwise to the top of the overlay. Cells were placed at 37°C to allow diffusion of the virus through the overlay to the cell monolayer and plates were stained with crystal violet at 1, 2, or 3 days post infection (dpi) to reveal the extent of cell death from viral replication.
